# Supplementary material
Source: MDPI journal article supplement (https://www.mdpi.com/2504-4494/7/6/209)
Supplement: s1 [file s1]

Archive with 1 entries (1 files):
- jmmp-2688271-supplementary.pdf
