# Supplementary material
Source: MDPI journal article supplement (https://www.mdpi.com/2504-4494/7/6/209)
Supplement: s1 [file s1 › jmmp-2688271-supplementary.pdf]

## Supplementary Data

### 1. Burr Height

Figure S1. OM (Optical Microscope) images displaying burrs after drilling processing. (a; C-40-40 sample #1, b; C-40-40 sample #2, c; C-80-40 sample #1, d; C-80-40 sample #2, e; C-120-40 sample #1, f; C-120-40 sample #2, g; L-40-40 sample #1, h; L-40-40 sample #2, i; L-80-40 sample #1, j; L-80-40 sample #2, k; L-120-40 sample #1, and l; L-120-40 sample #2)

a)

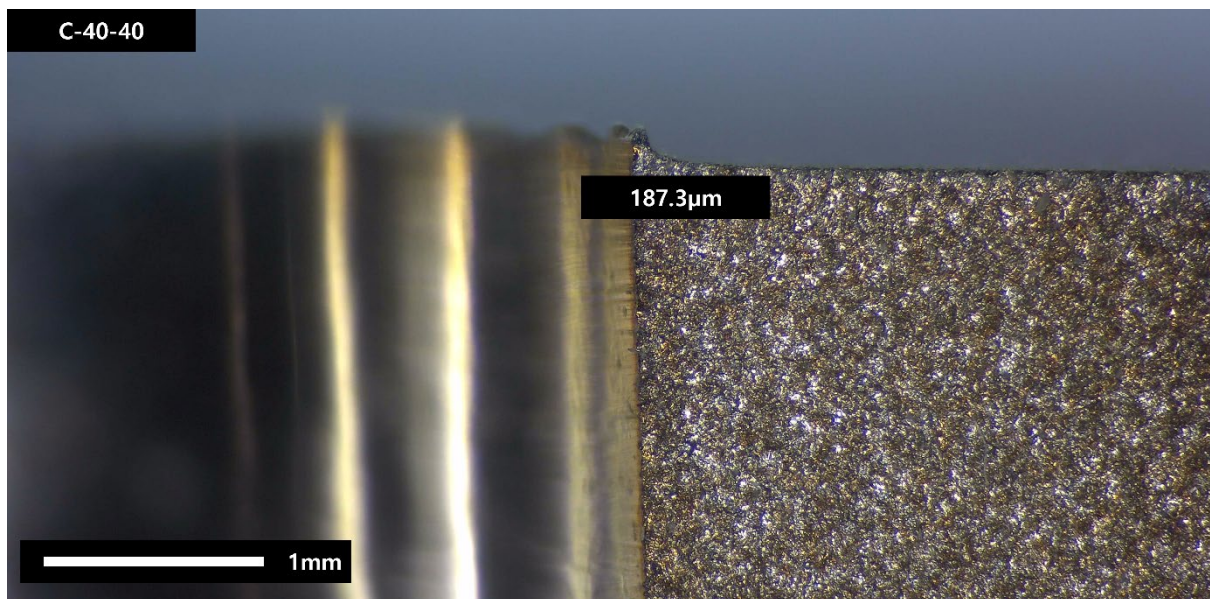

b)

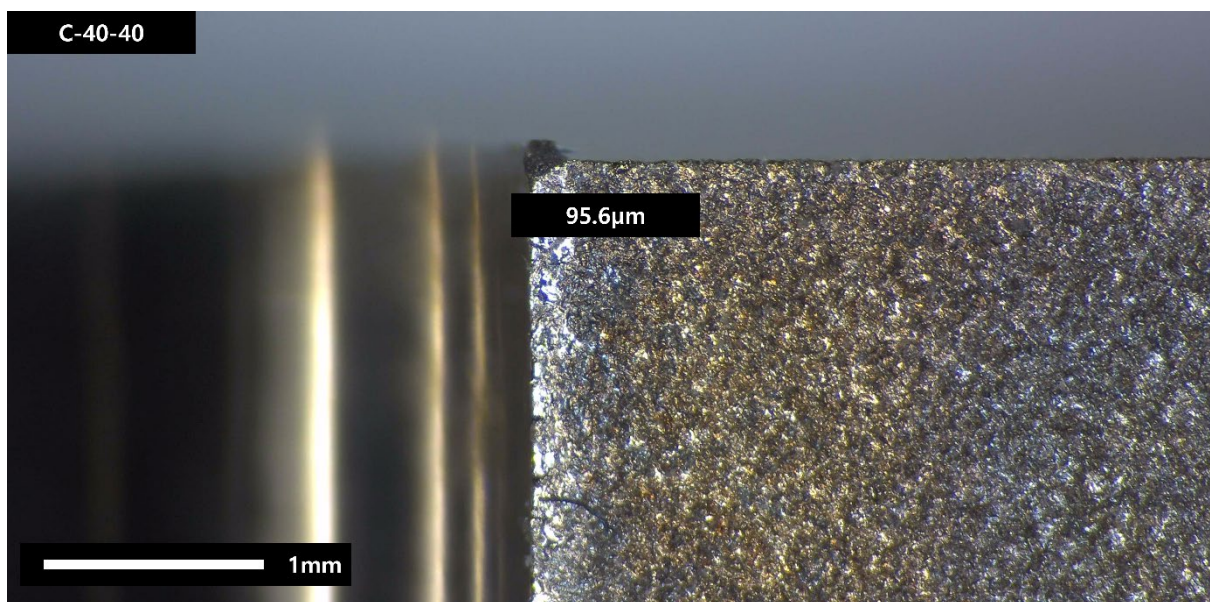

c)

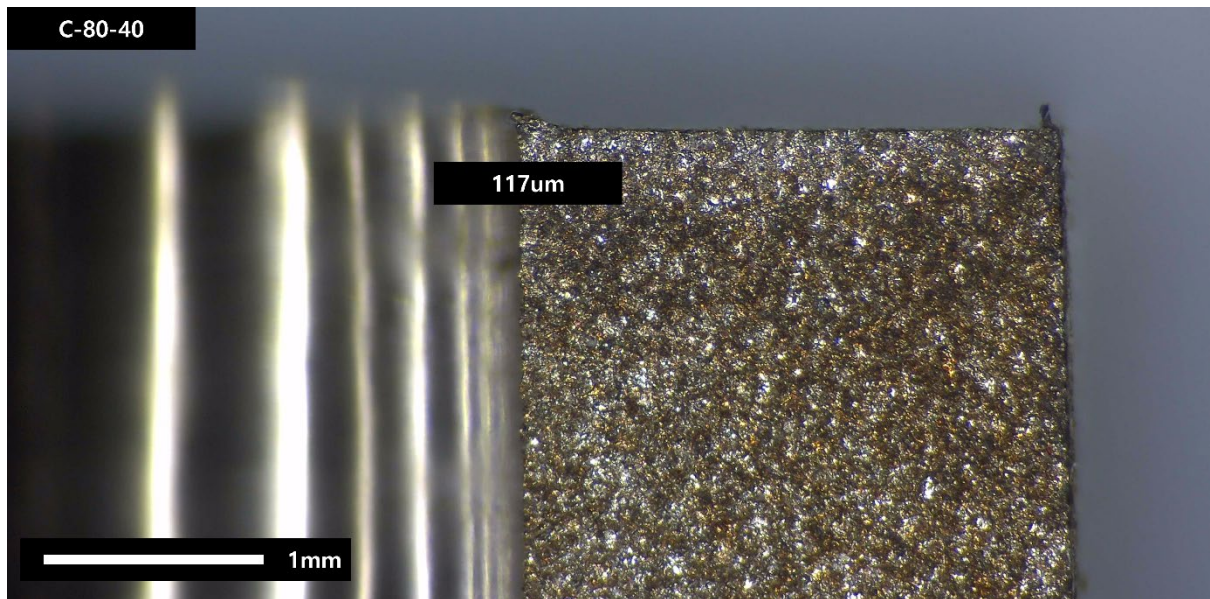

d)

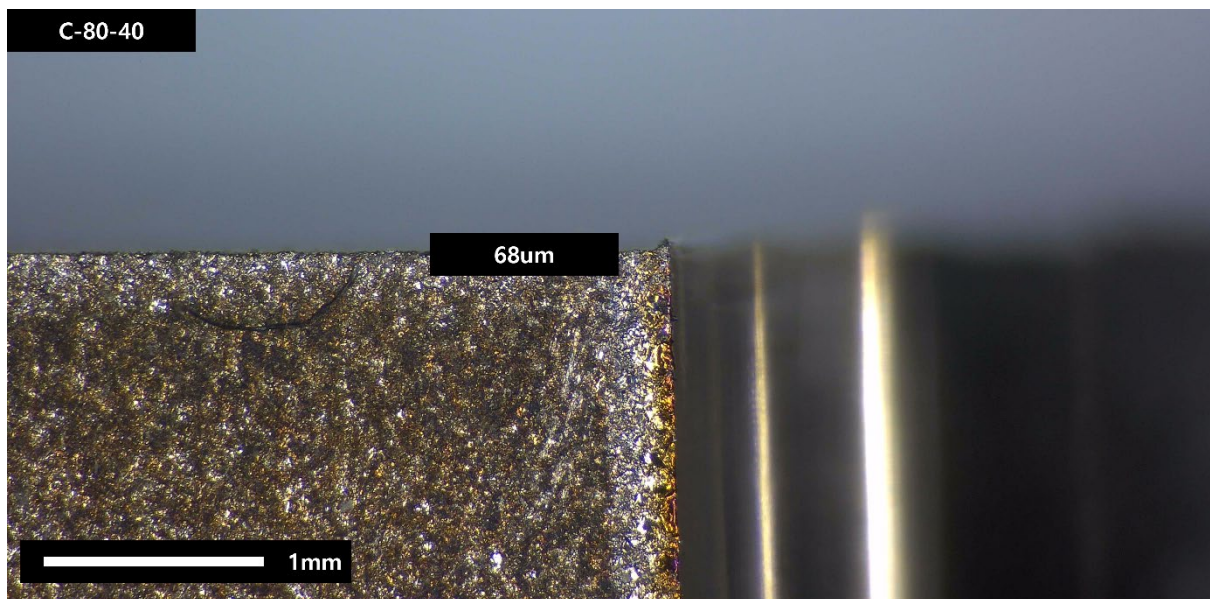

e)

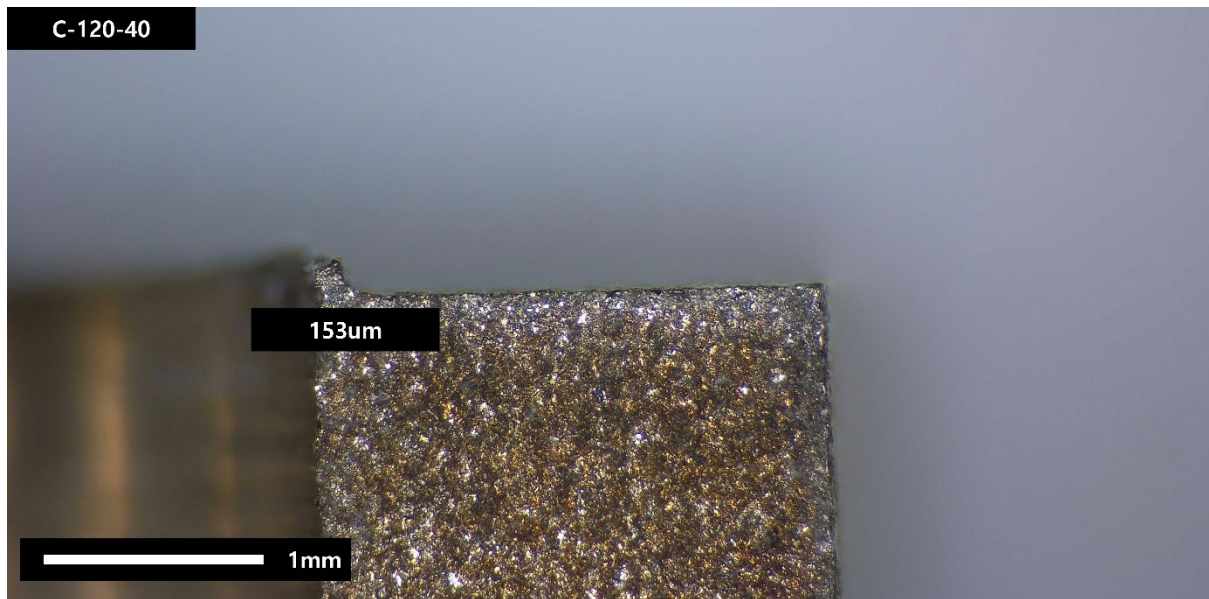

f)

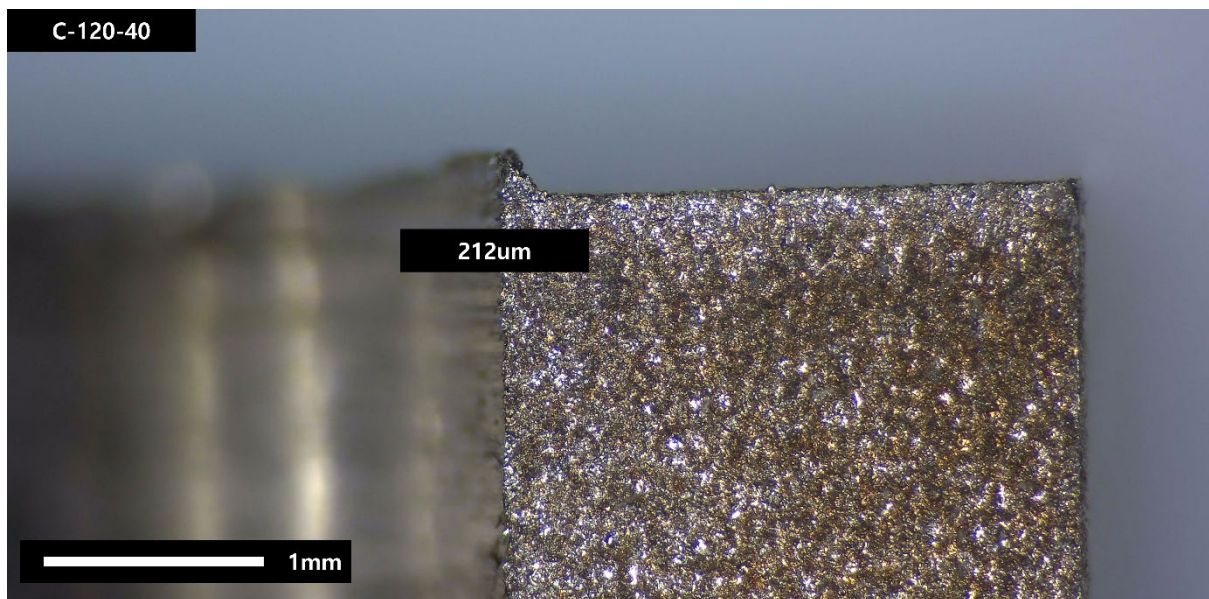

g)

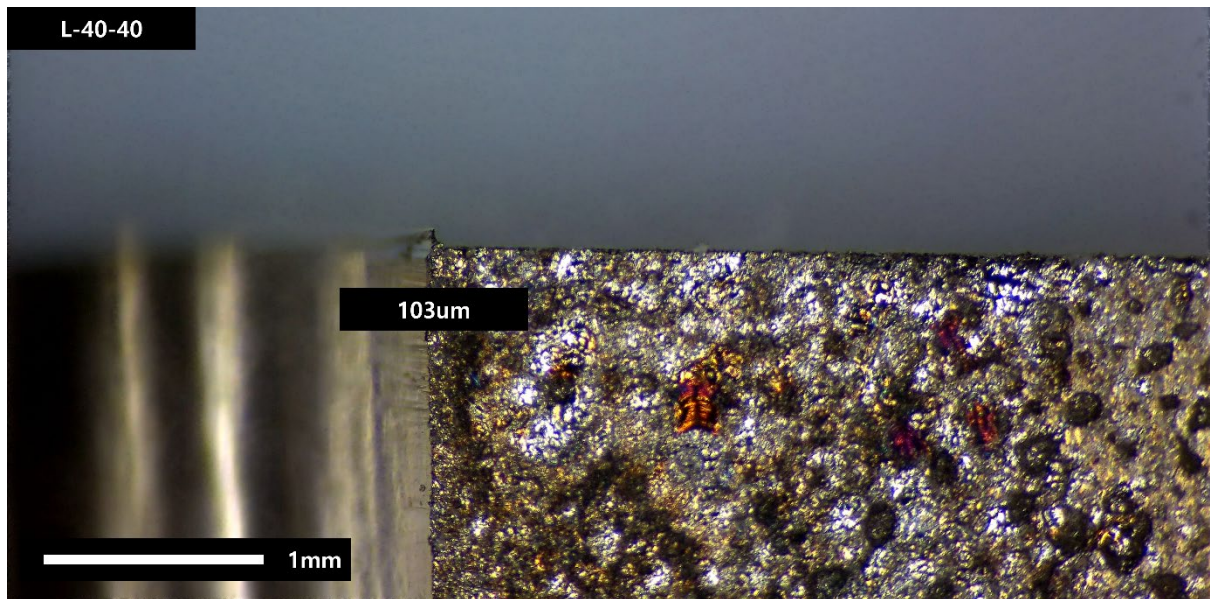

h)

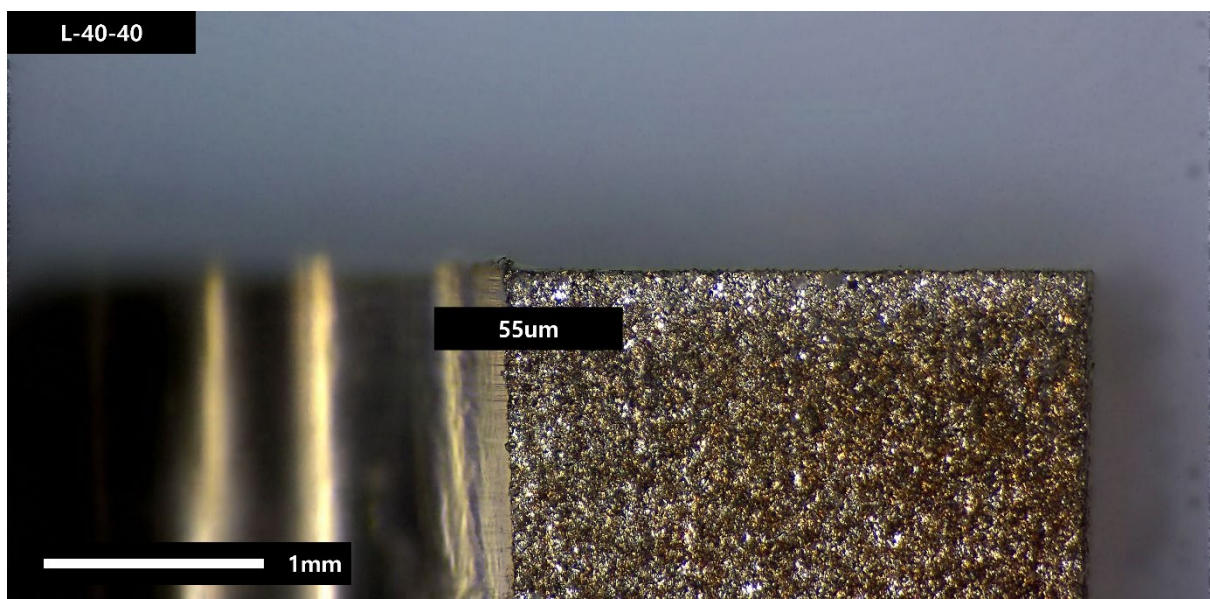

i)

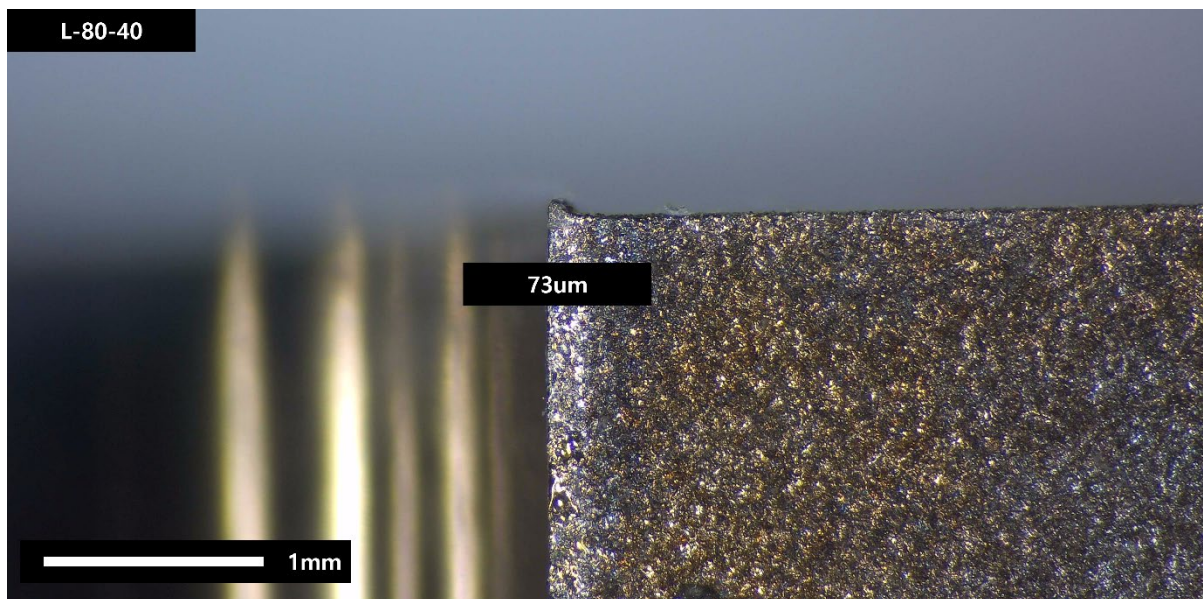

j)

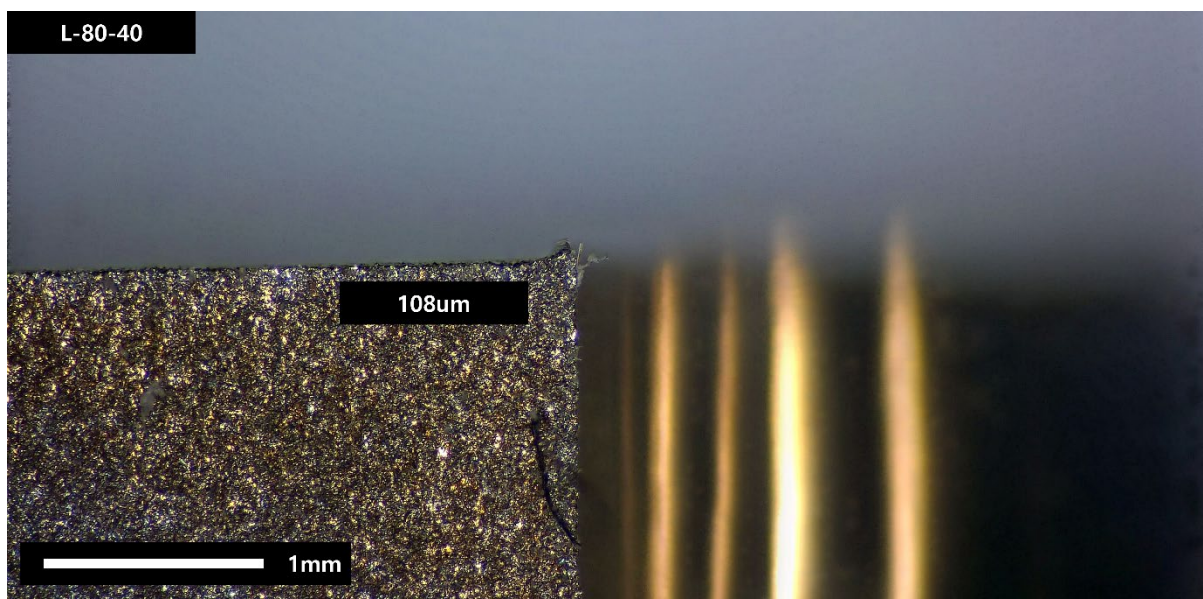

k)

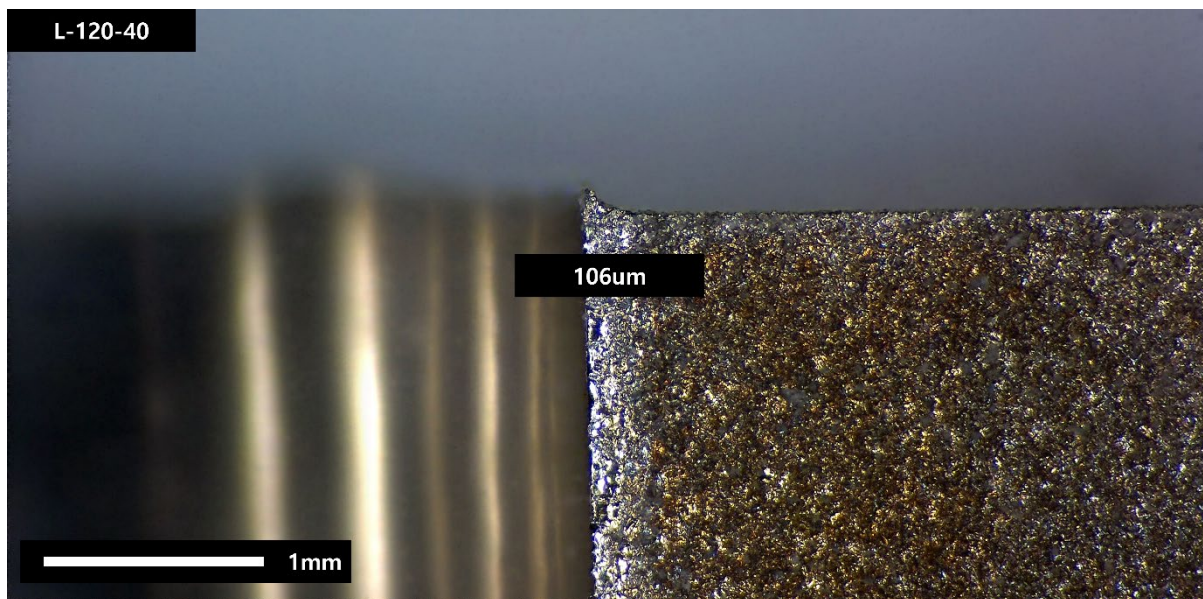

l)

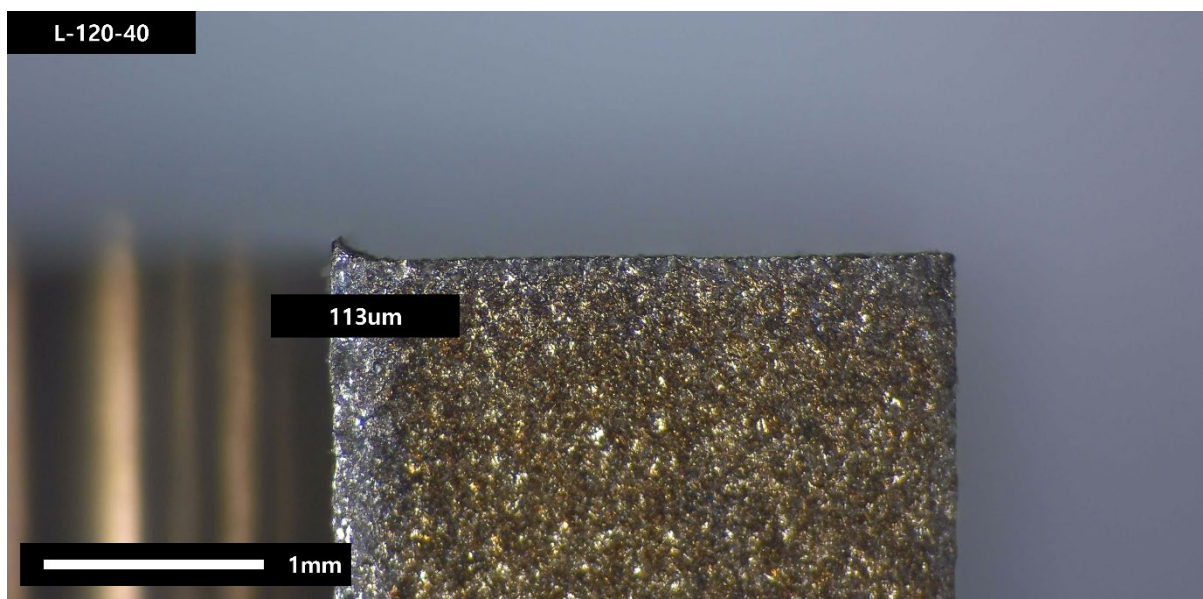

## 2. Surface Roughness

Surface roughness is measured by dividing the total length into five sections of 5mm each, totaling 25mm. This process was repeated twice, and the table below represents the results.

Table S1. The detailed surface roughness results measured under each condition.

| Surface Roughness |                      |                         |
|-------------------|----------------------|-------------------------|
|                   | CD [ $\mu\text{m}$ ] | LFVAD [ $\mu\text{m}$ ] |
| Vc: 40m/s #1      | 2.897                | 1.0787                  |
| Vc: 40m/s #2      | 1.721                | 1.3691                  |
| Vc: 80m/s #1      | 2.24                 | 1.0879                  |
| Vc: 80m/s #2      | 0.8318               | 0.8162                  |
| Vc:120m/s #1      | 2.124                | 2.2801                  |
| Vc:120m/s #2      | 2.3244               | 2.2852                  |

### 3. Residual Stress

Figure S2. The detailed residual stress results measured under each condition. a; C-40-40, b; C-80-40, c; C-120-40, d; L-40-40, e; L-80-40, and f; L-120-40

a) C-40-40

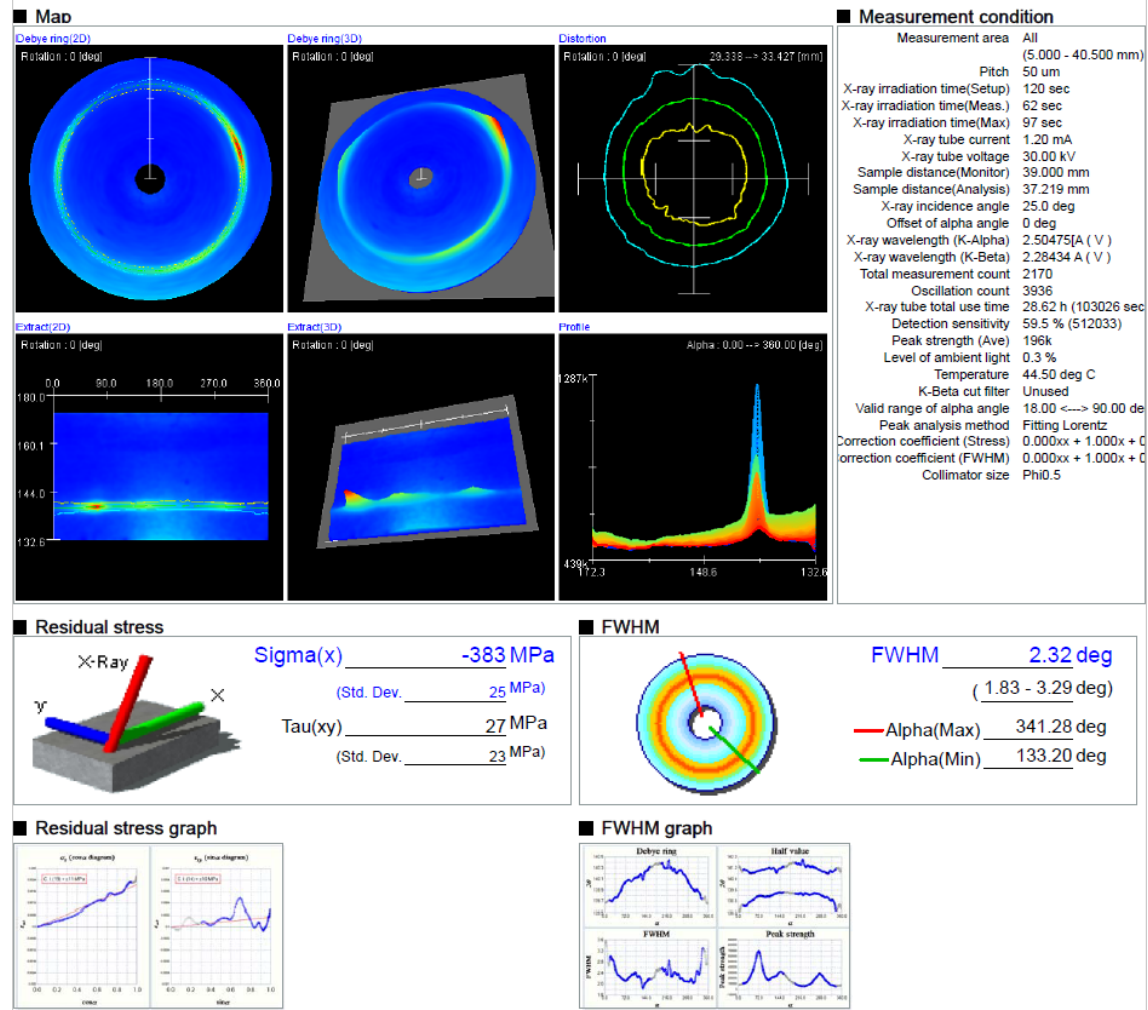

**Residual stress**  
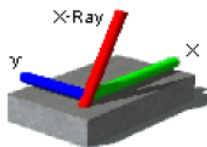

Sigma(x) -383 MPa  
(Std. Dev. 25 MPa)  
Tau(xy) 27 MPa  
(Std. Dev. 23 MPa)

**FWHM**  
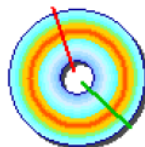

FWHM 2.32 deg  
( 1.83 - 3.29 deg)  
Alpha(Max) 341.28 deg  
Alpha(Min) 133.20 deg

**Residual stress graph**  
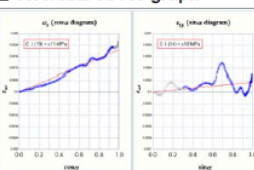

**FWHM graph**  
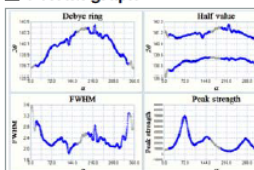

b) C-80-40

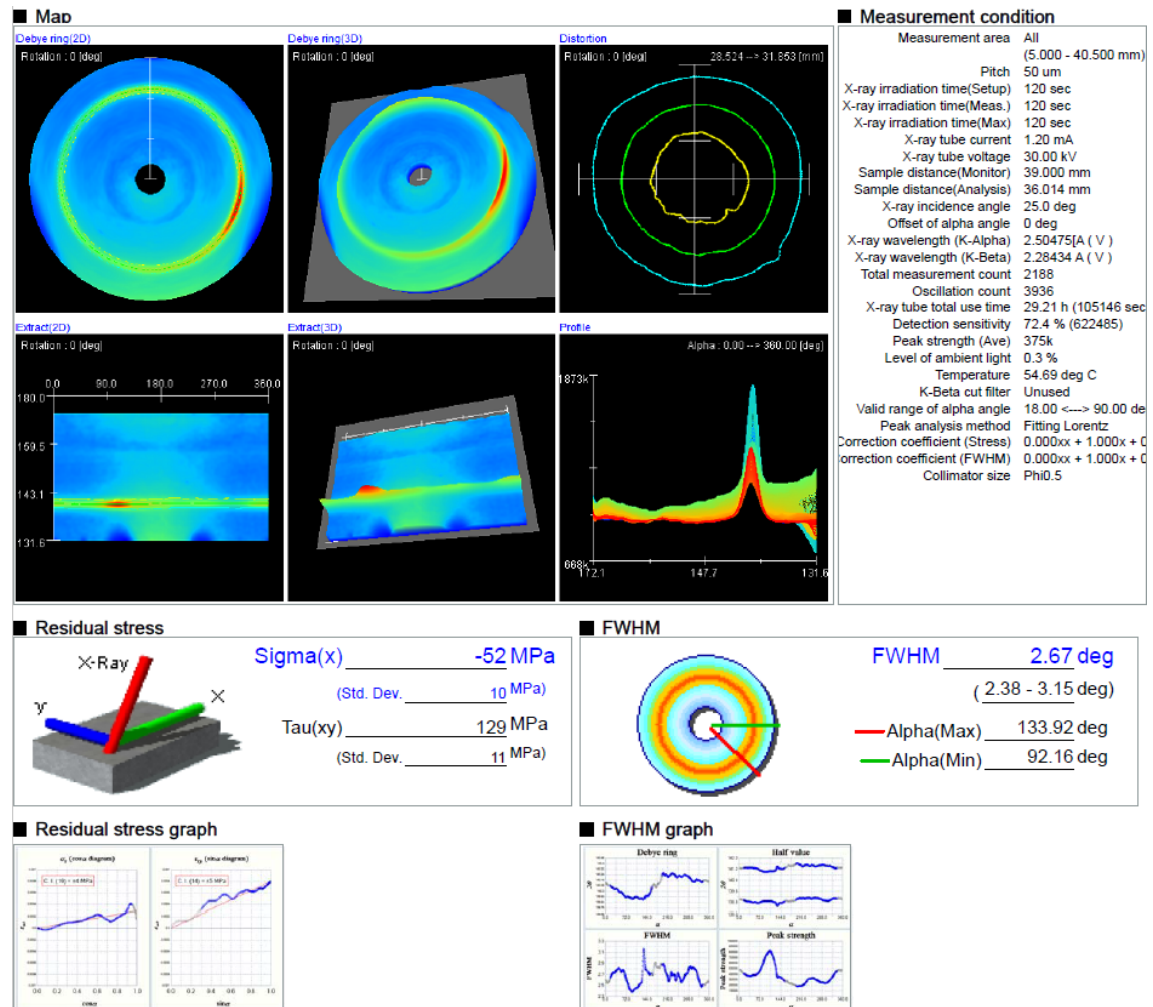

c) C-120-40

■ Mad

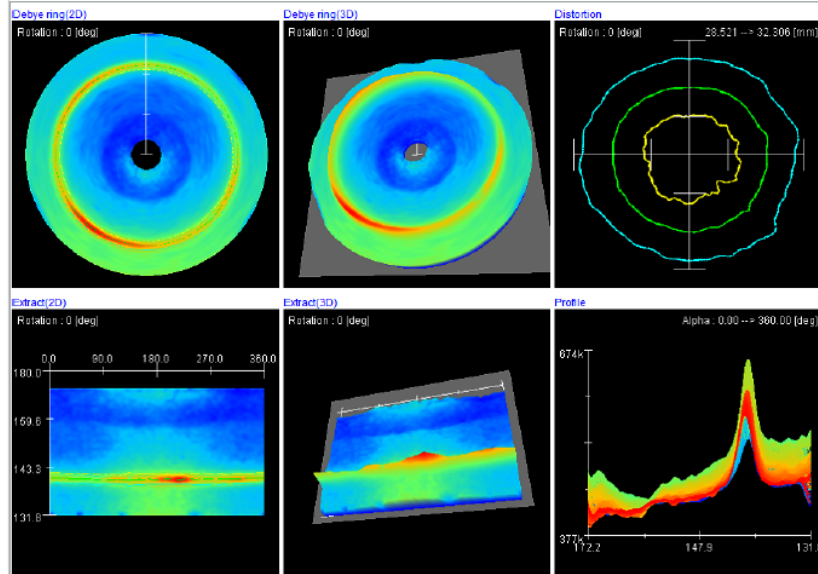

### ■ Measurement condition

|                                 |                            |
|---------------------------------|----------------------------|
| Measurement area                | All<br>(5,000 - 40,500 mm) |
| Pitch                           | 50 $\mu$ m                 |
| X-ray irradiation time(Setup)   | 120 sec                    |
| X-ray irradiation time(Meas.)   | 207 sec                    |
| X-ray irradiation time(Max)     | 120 sec                    |
| X-ray tube current              | 1.20 mA                    |
| X-ray tube voltage              | 30.00 kV                   |
| Sample distance(Monitor)        | 39,000 mm                  |
| Sample distance(Analysis)       | 36,268 mm                  |
| X-ray incidence angle           | 25.0 deg                   |
| Offset of alpha angle           | 0 deg                      |
| X-ray wavelength (K-Alpha)      | 2.50475 Å (V)              |
| X-ray wavelength (K-Beta)       | 2.28434 Å (V)              |
| Total measurement count         | 2237                       |
| Oscillation count               | 3936                       |
| X-ray tube total use time       | 30.82 h (110951 sec)       |
| Detection sensitivity           | 15.2 % (261714)            |
| Peak strength (Ave)             | 110k                       |
| Level of ambient light          | 0.3 %                      |
| Temperature                     | 46.13 deg C                |
| K-Beta cut filter               | Unused                     |
| Valid range of alpha angle      | 18.00 <--> 90.00 deg       |
| Peak analysis method            | Fitting Lorentz            |
| Correction coefficient (Stress) | 0.0000x + 1.0000x + C      |
| Correction coefficient (FWHM)   | 0.0000x + 1.0000x + C      |
| Collimator size                 | Phi0.5                     |

- Residual stress

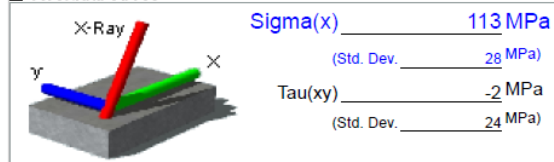

■ FWHM

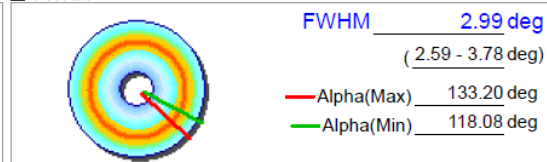

### ■ Residual stress graph

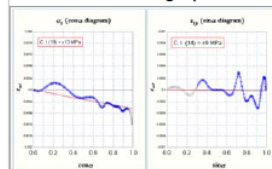

■ FWHM graph

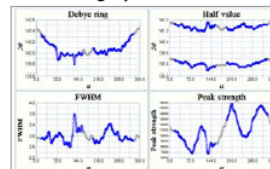

d) L-40-40

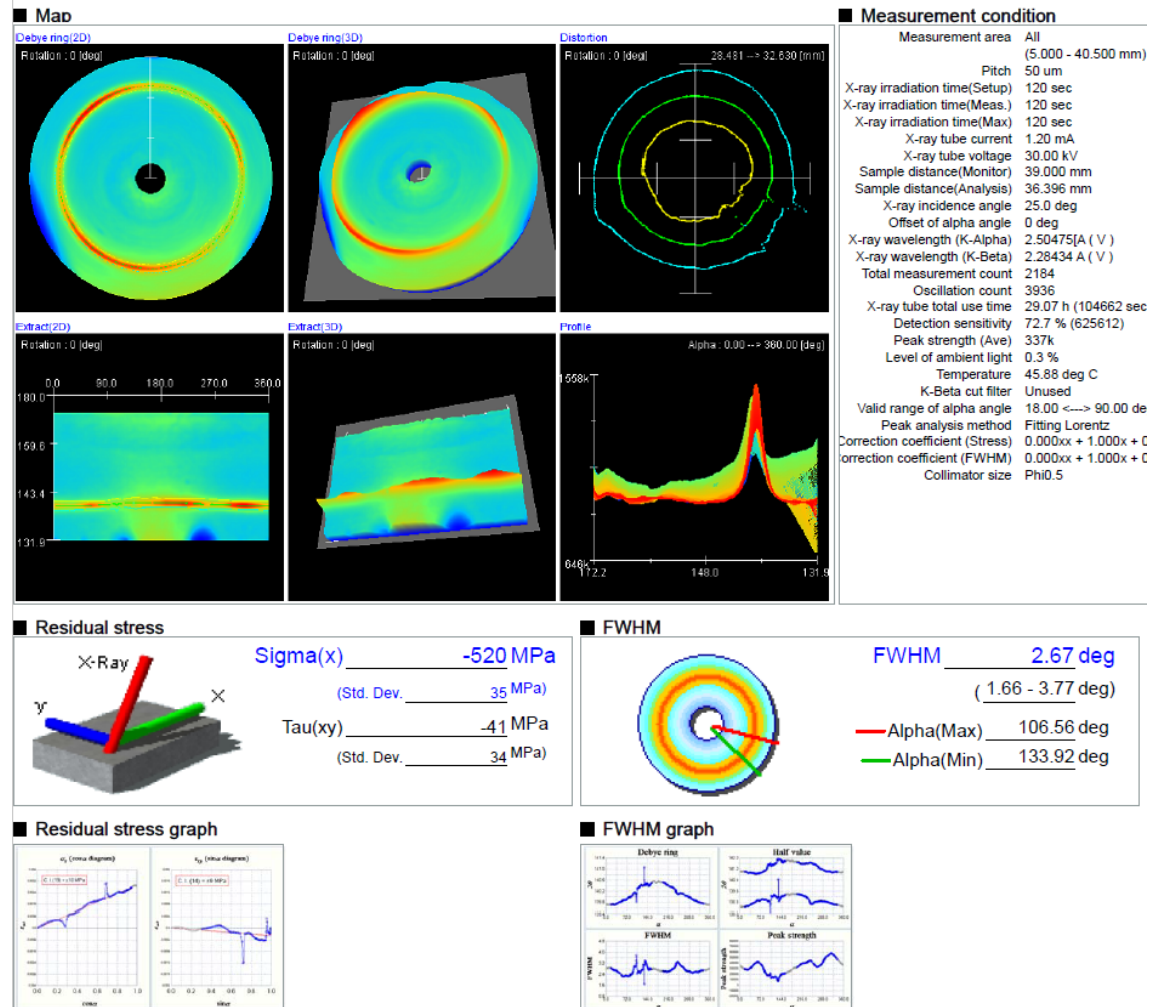

e) L-80-40

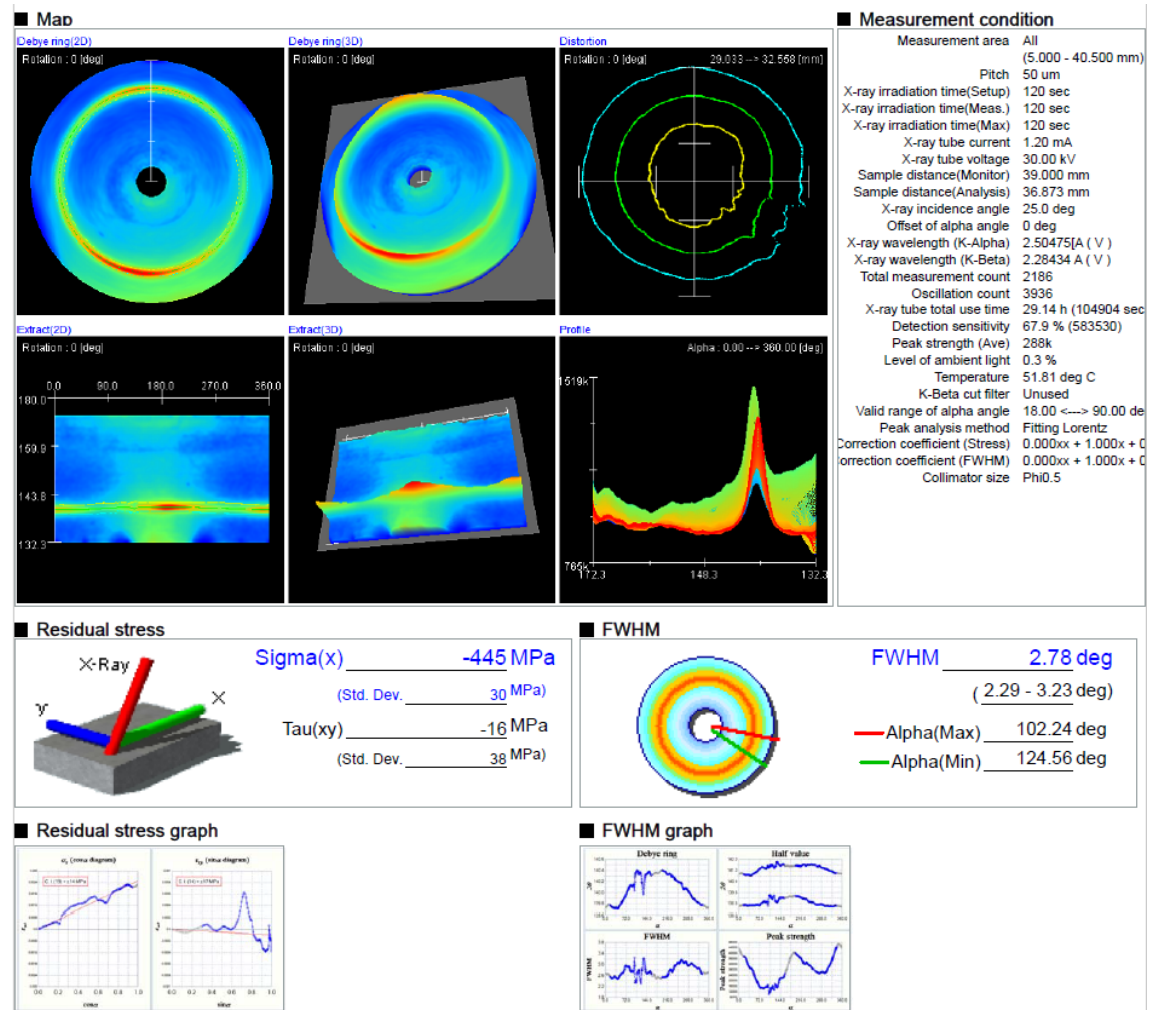

f) L-120-40

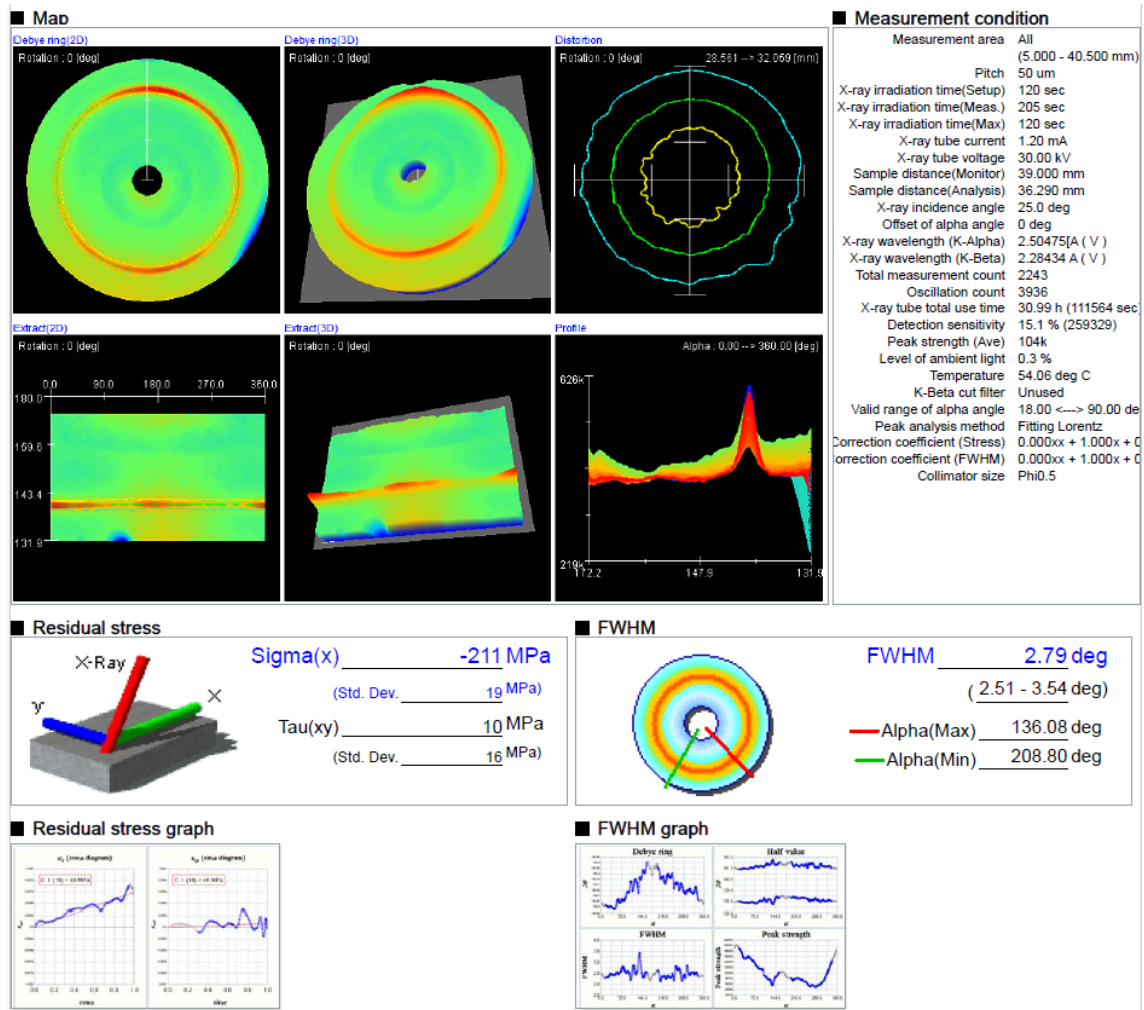

### Residual stress graph

$\sigma_x$  (MPa) (degrees)

$\sigma_y$  (MPa) (degrees)

### FWHM graph

Debye ring

Half value

FWHM

Peak strength
